# Supplementary material
Source: PubMed Central journal article supplement (PMC3220468)
Supplement: supp_M111.300988_jbc.M111.300988-1.pdf [file supp_M111.300988_jbc.M111.300988-1.pdf]

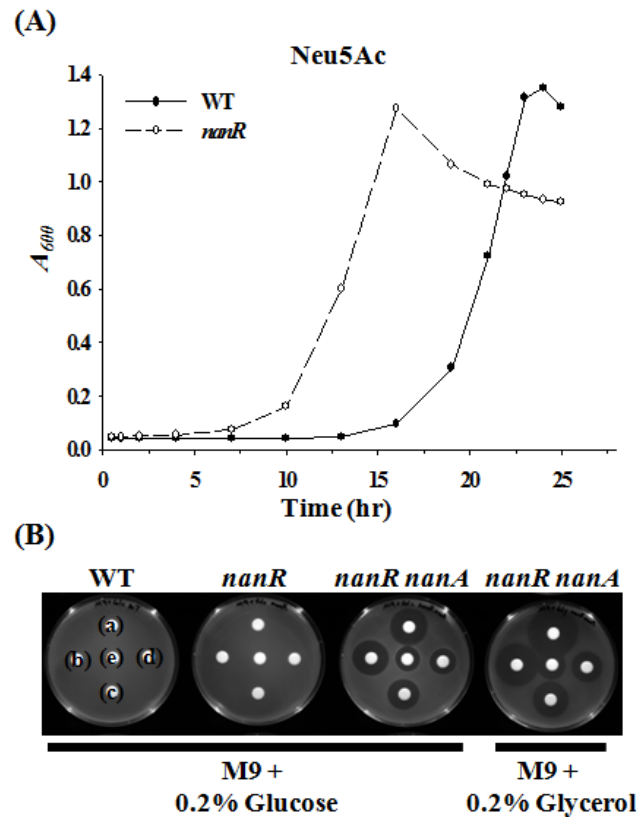

**Supplementary Fig. S1. Effect of the *nanR* mutation on the *V. vulnificus* growth.** (A) Cultures of the wild type and the *nanR* mutant BS0805 were grown in M9 media supplemented with 5mM Neu5Ac as a sole carbon source. Growth was monitored by measuring  $A_{600}$  of the cultures and represents the mean from three independent experiments. (B) Growth inhibition of the strains by Neu5Ac was examined by disk diffusion assay using a method previously described (See a reference 33 in text). Overnight cultures (100  $\mu$ l) of *V. vulnificus* strains were mixed with melted agar (0.6%, w/v) and overlaid on the M9 media supplemented with different carbon sources as indicated. Filter disks were soaked with 20  $\mu$ l of water containing 50mM (a), 25mM (b), 12.5mM (c), 6.25mM (d), and 3.125mM (e) of Neu5Ac and placed on the overlay. The plates were incubated at 30 °C for 16 h and effects of Neu5Ac on the growth of the *V. vulnificus* were photographed.
