# Supplementary material
Source: PubMed Central journal article supplement (PMC3220468)
Supplement: supp_M111.300988_jbc.M111.300988-3.pdf [file supp_M111.300988_jbc.M111.300988-3.pdf]

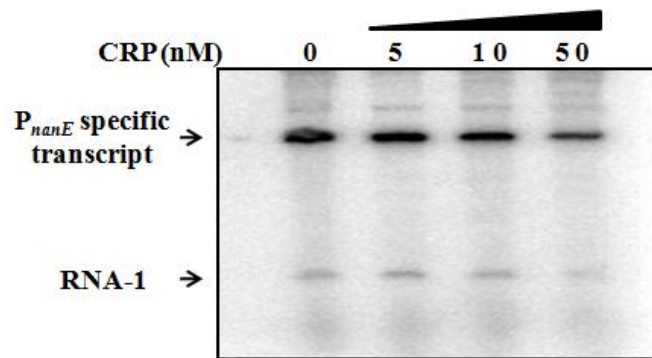

**Supplementary Fig. S3. Effects of CRP on the  $P_{nanE}$  activity *in vitro*.** Supercoiled plasmid pBS0921 containing the  $P_{nanE}$  was used as a template DNA and transcribed *in vitro* in the presence of the enhancing concentrations of CRP with 1mM cAMP. Details for preparation of the supercoiled template DNA and *in vitro* transcription are given in Materials and Methods. The 370 base  $P_{nanE}$  specific transcripts and vector derived control transcripts RNA-1 are indicated.
